# Supplementary material for: Serial Spatial Transcriptomics Reveal Divergent Routes to Therapy Resistance in Metastatic Breast Cancer
Source: Research Square preprint supplement (doi:10.21203/rs.3.rs-9365657/v1), 2026-04-15
Supplement: Supplementary file 1 [file 44cacfe6d0c7f4bab69c2ef3.pdf]

# E1

**a**

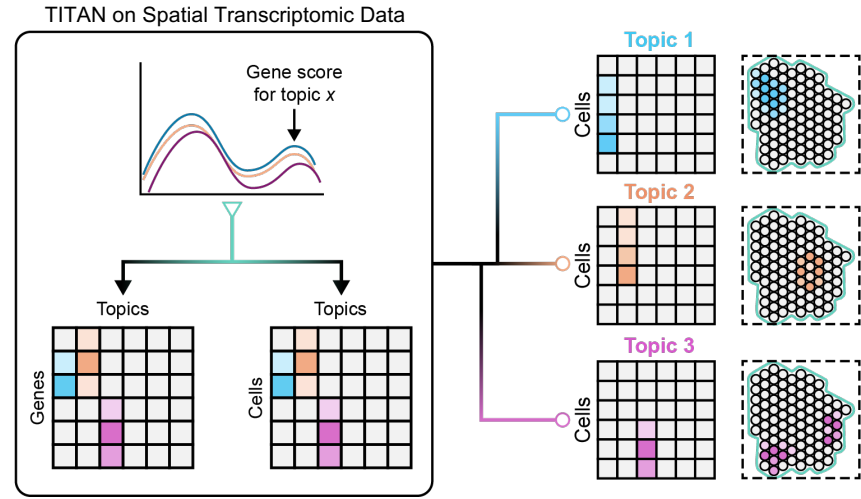

**b** Incorporating spatial data to TITAN

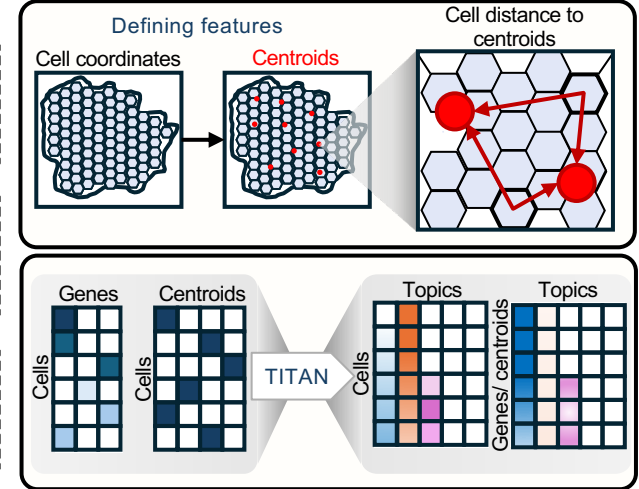

**c**

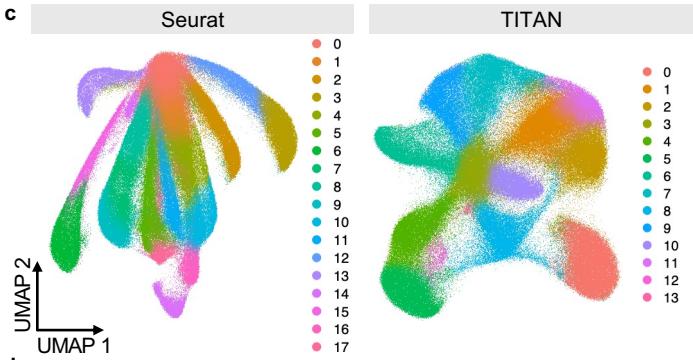

**d**

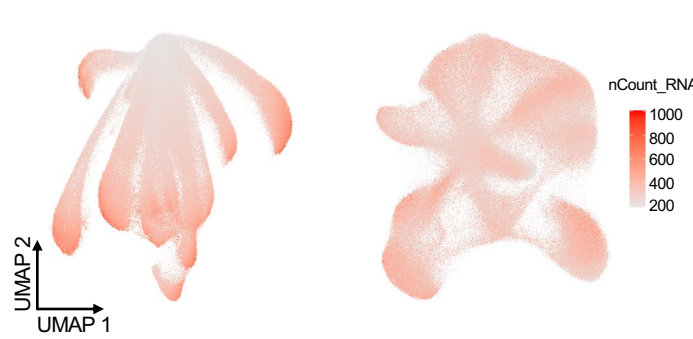

**e**

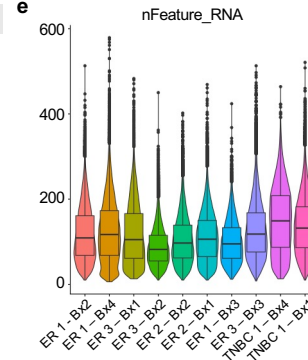

**f**

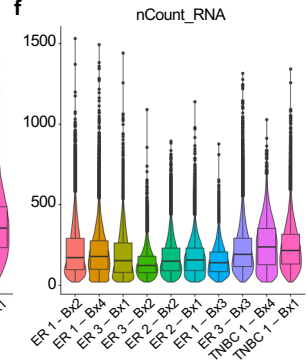

**g**

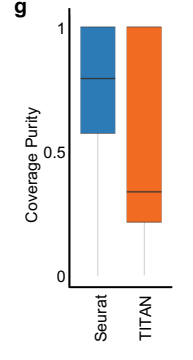

**h**

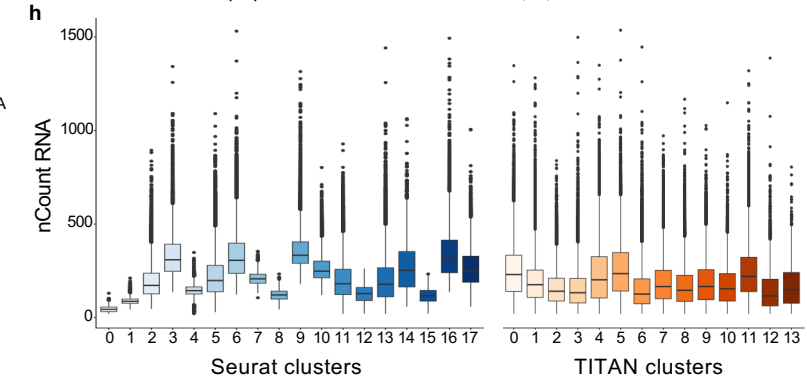

**i**

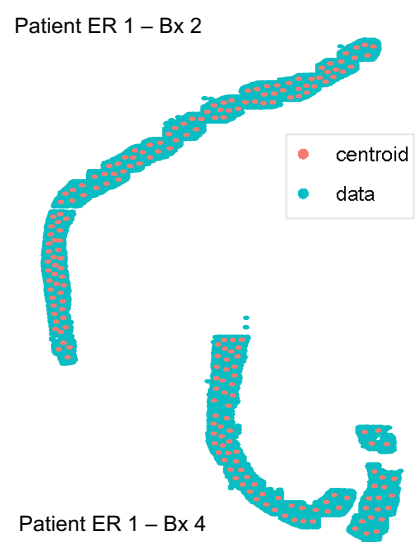

**j**

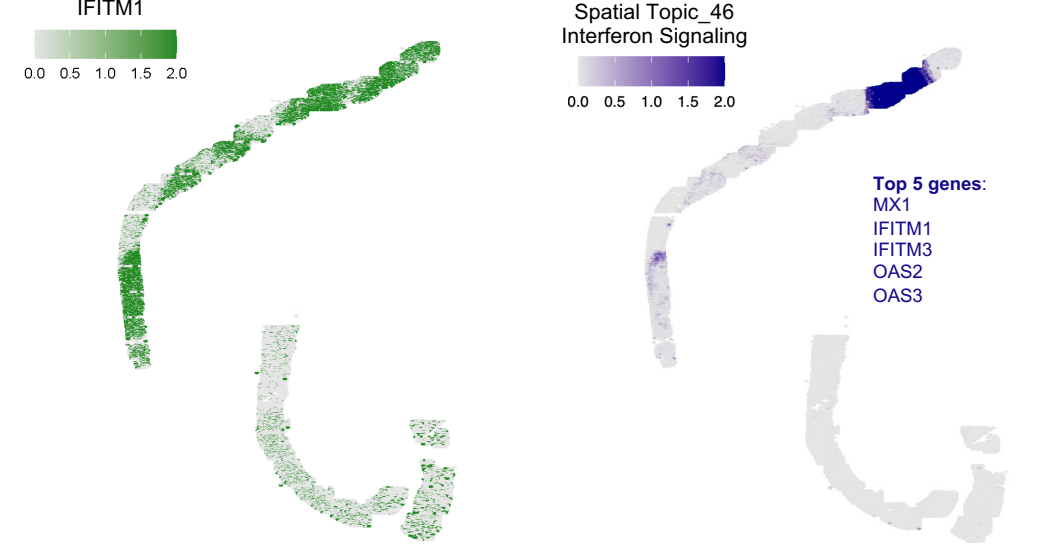

Patient ER 1 – Biopsy 2  
Liver Metastasis

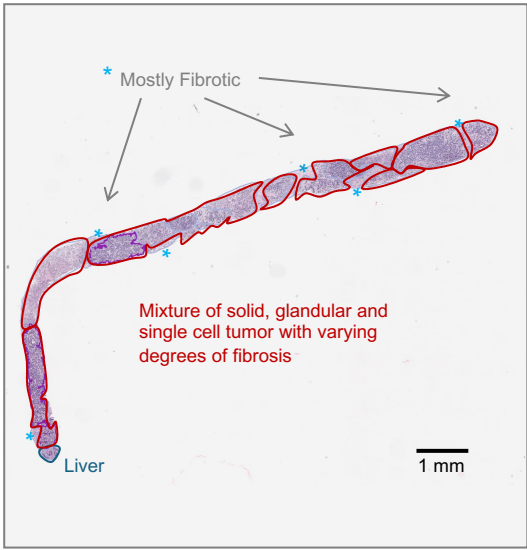

Patient ER 1 – Biopsy 3  
Lumbar Spine Metastasis

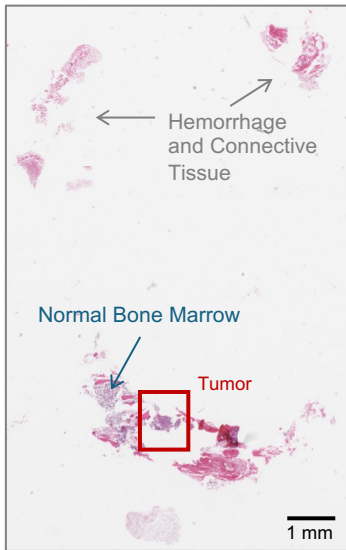

Patient ER 1 – Biopsy 4  
Liver Metastasis

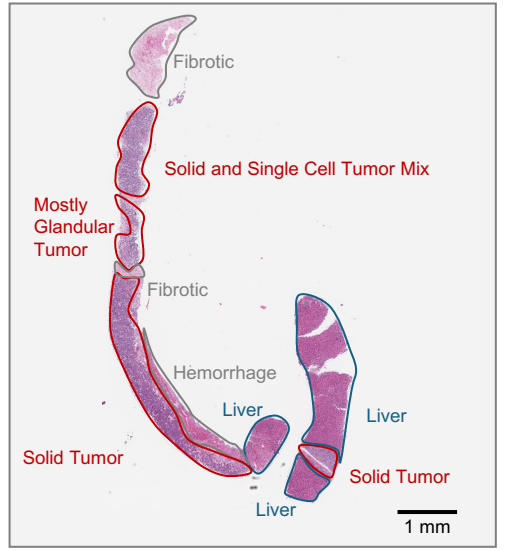

Patient ER 2 – Biopsy 1  
Lymph Node Metastasis

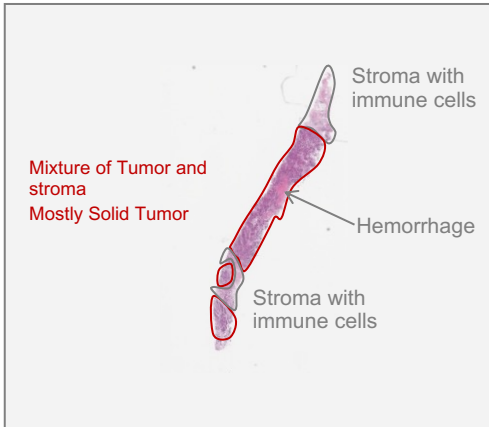

Patient ER 2 – Biopsy 2  
Lymph Node Metastasis

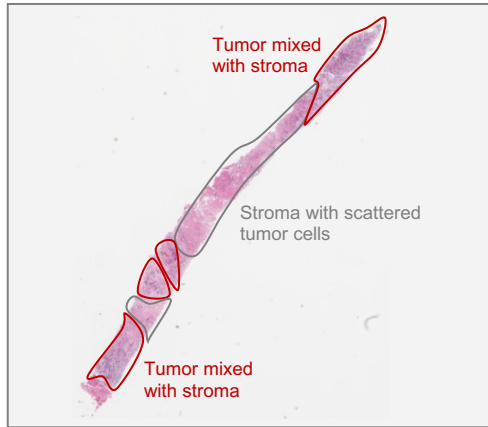

Patient ER 3 – Biopsy 1  
Lymph Node Metastasis

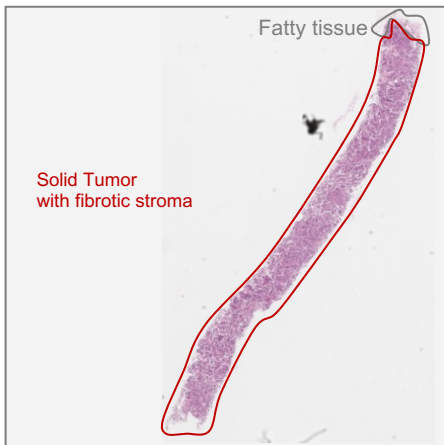

Patient ER 3 – Biopsy 2  
Liver Metastasis

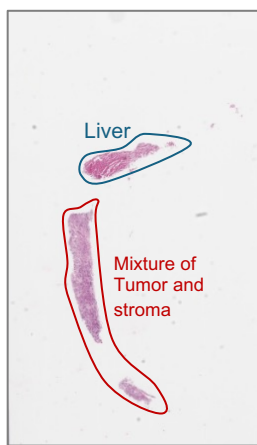

Patient ER 3 – Biopsy 3  
Liver Metastasis

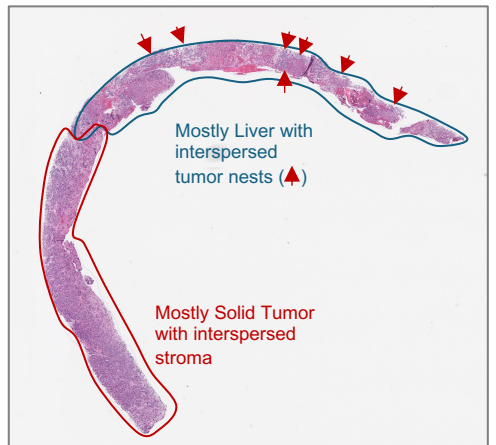

Patient TNBC 1 – Biopsy 1  
Lymph Node Metastasis

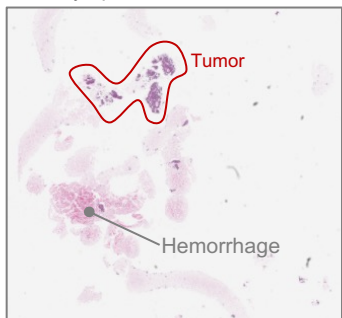

Patient TNBC 1 – Biopsy 4  
Soft Tissue Metastasis

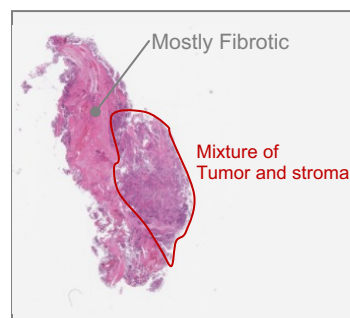

E3

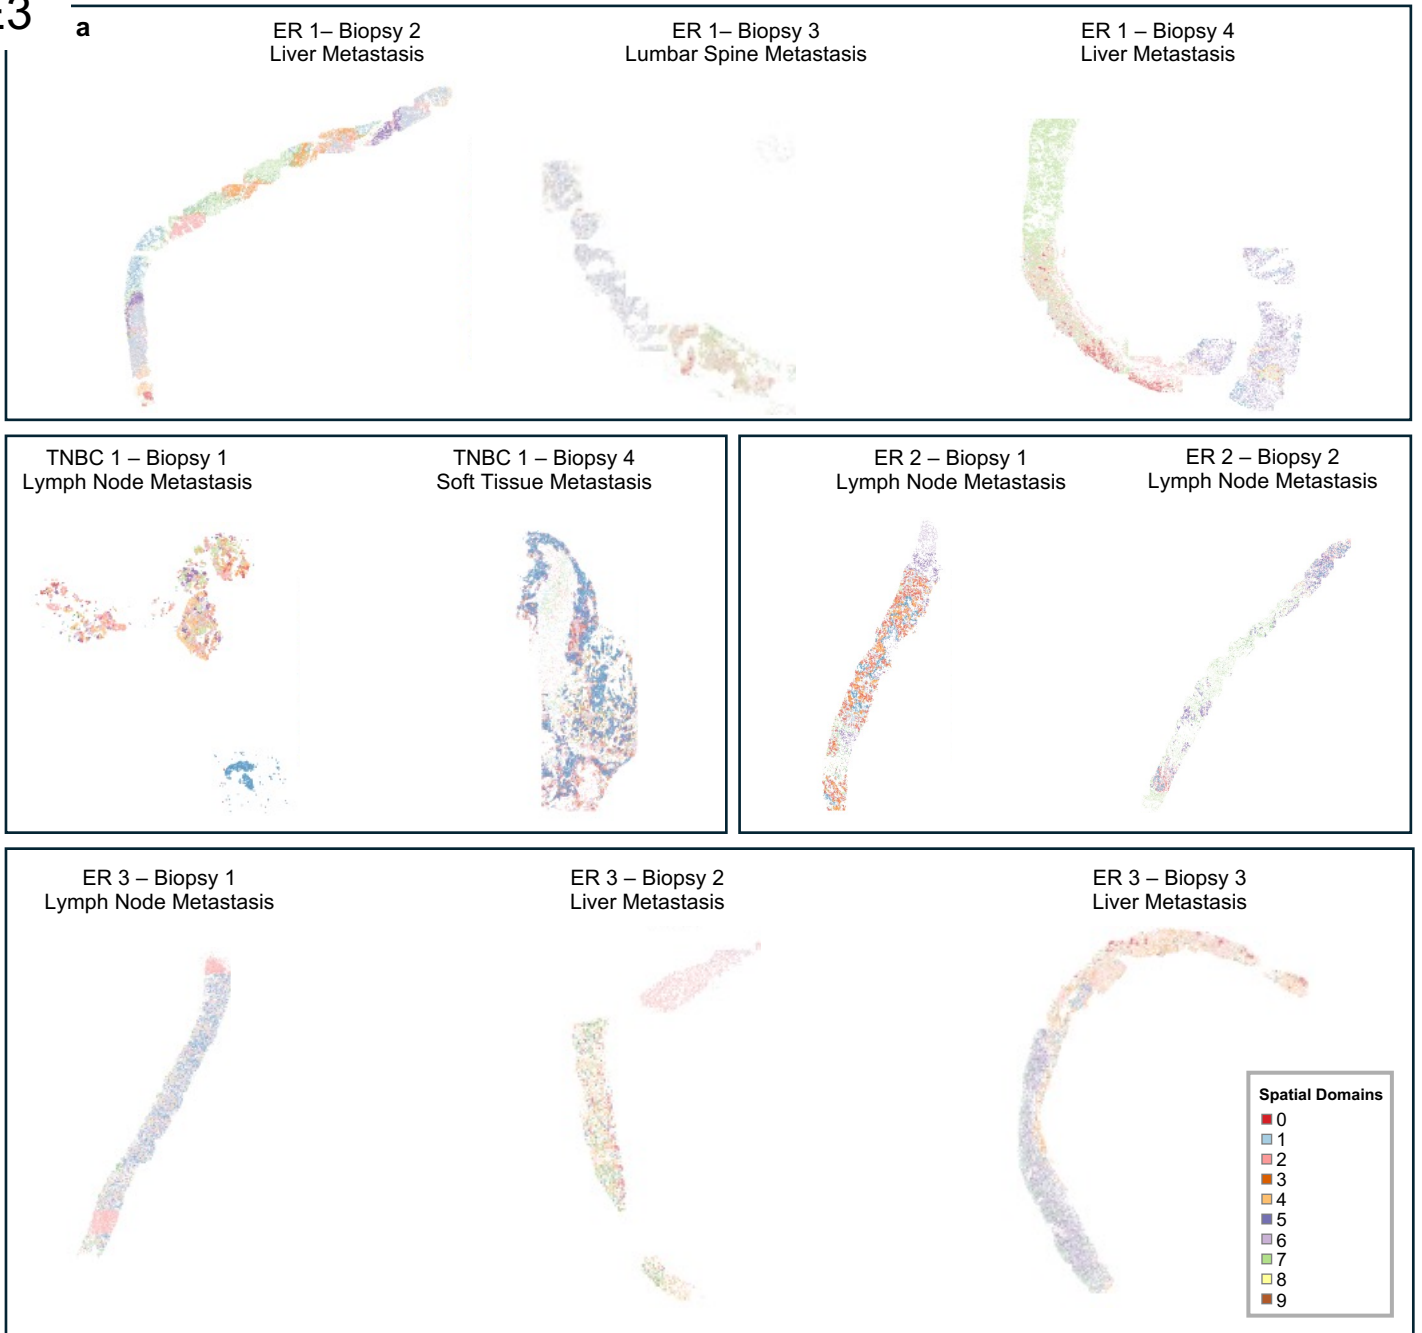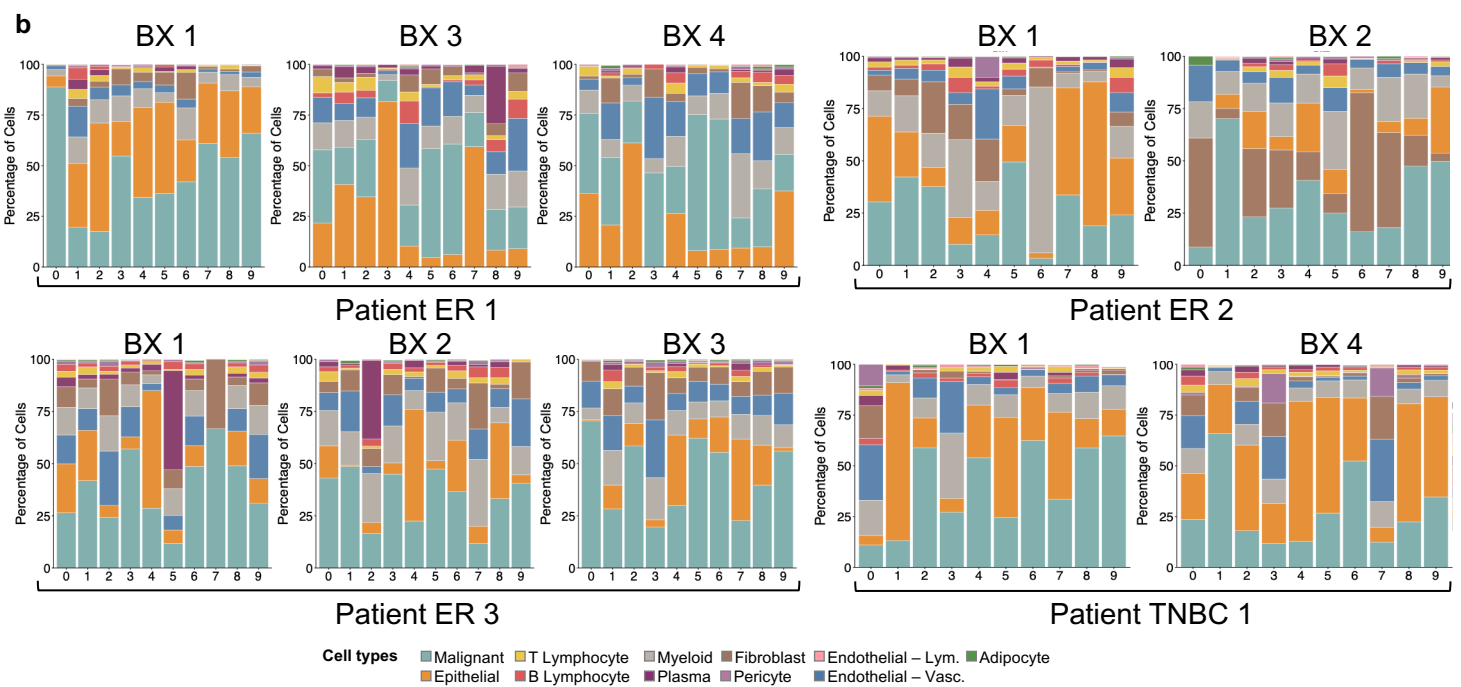

E4

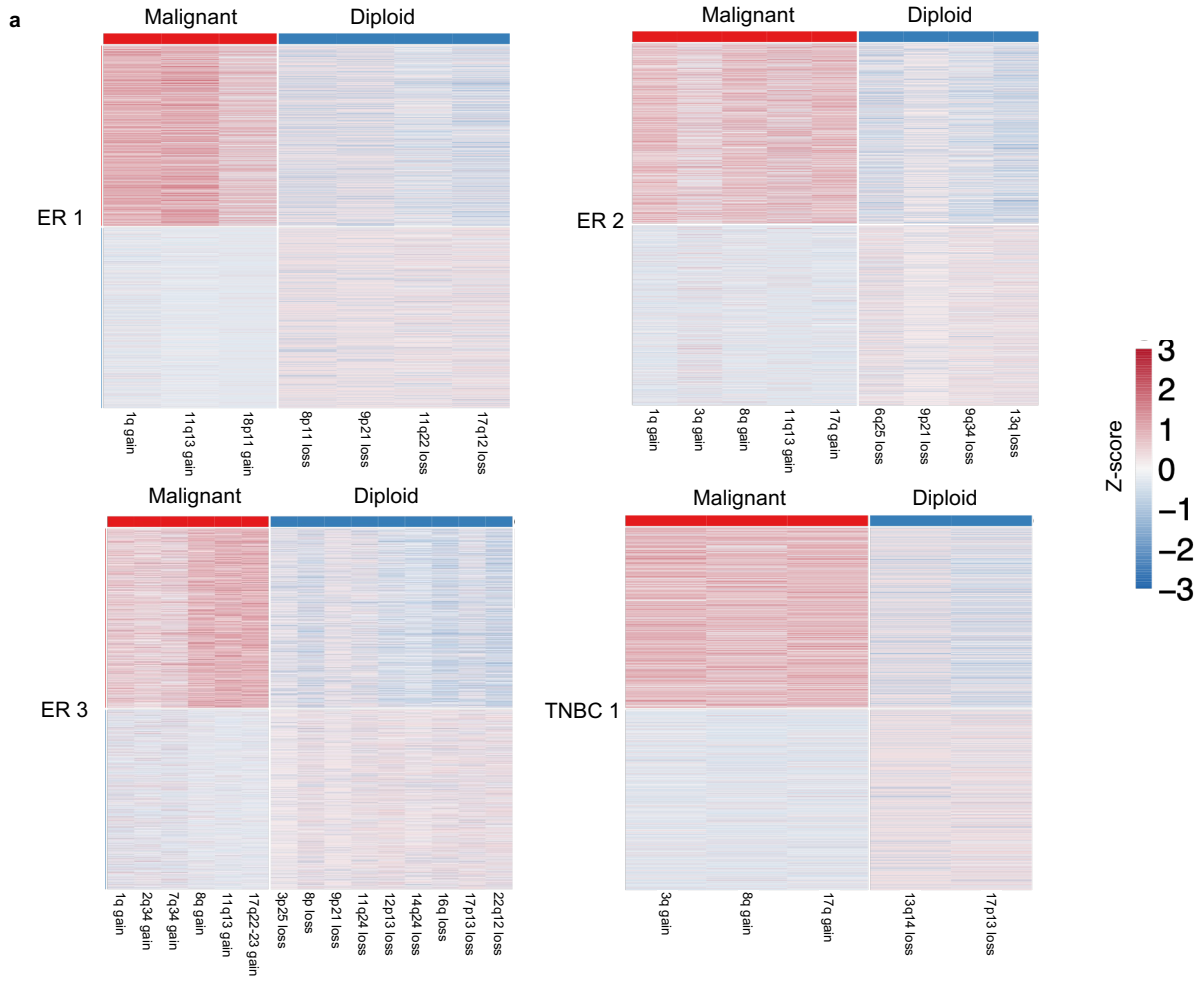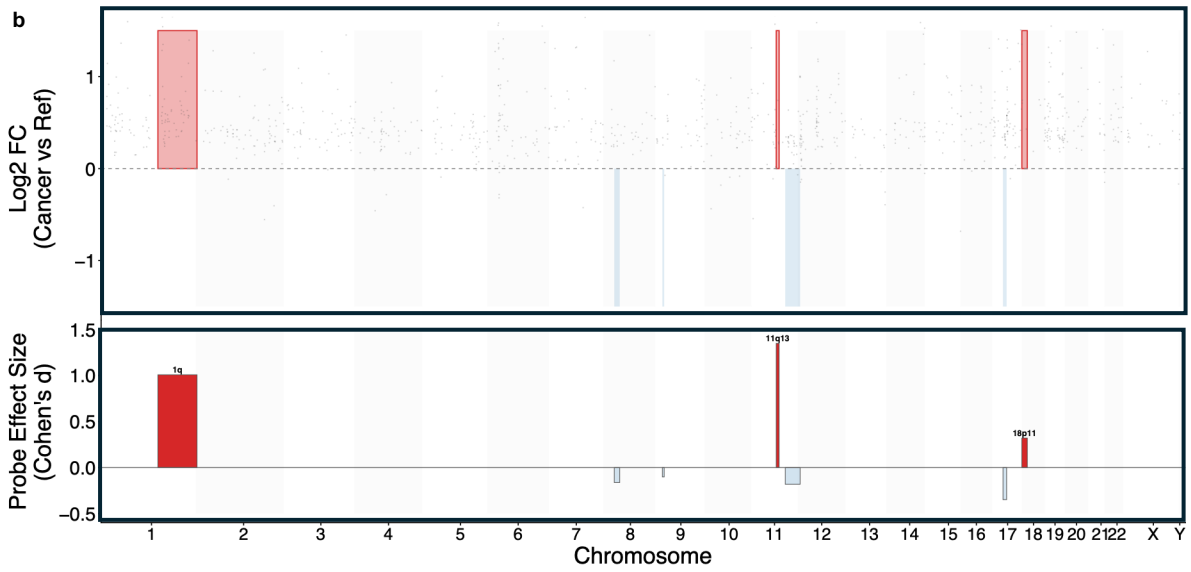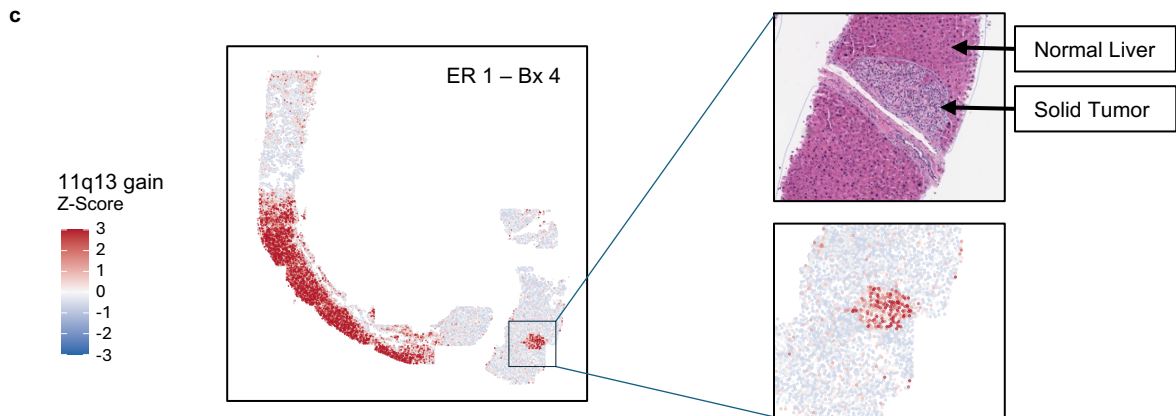

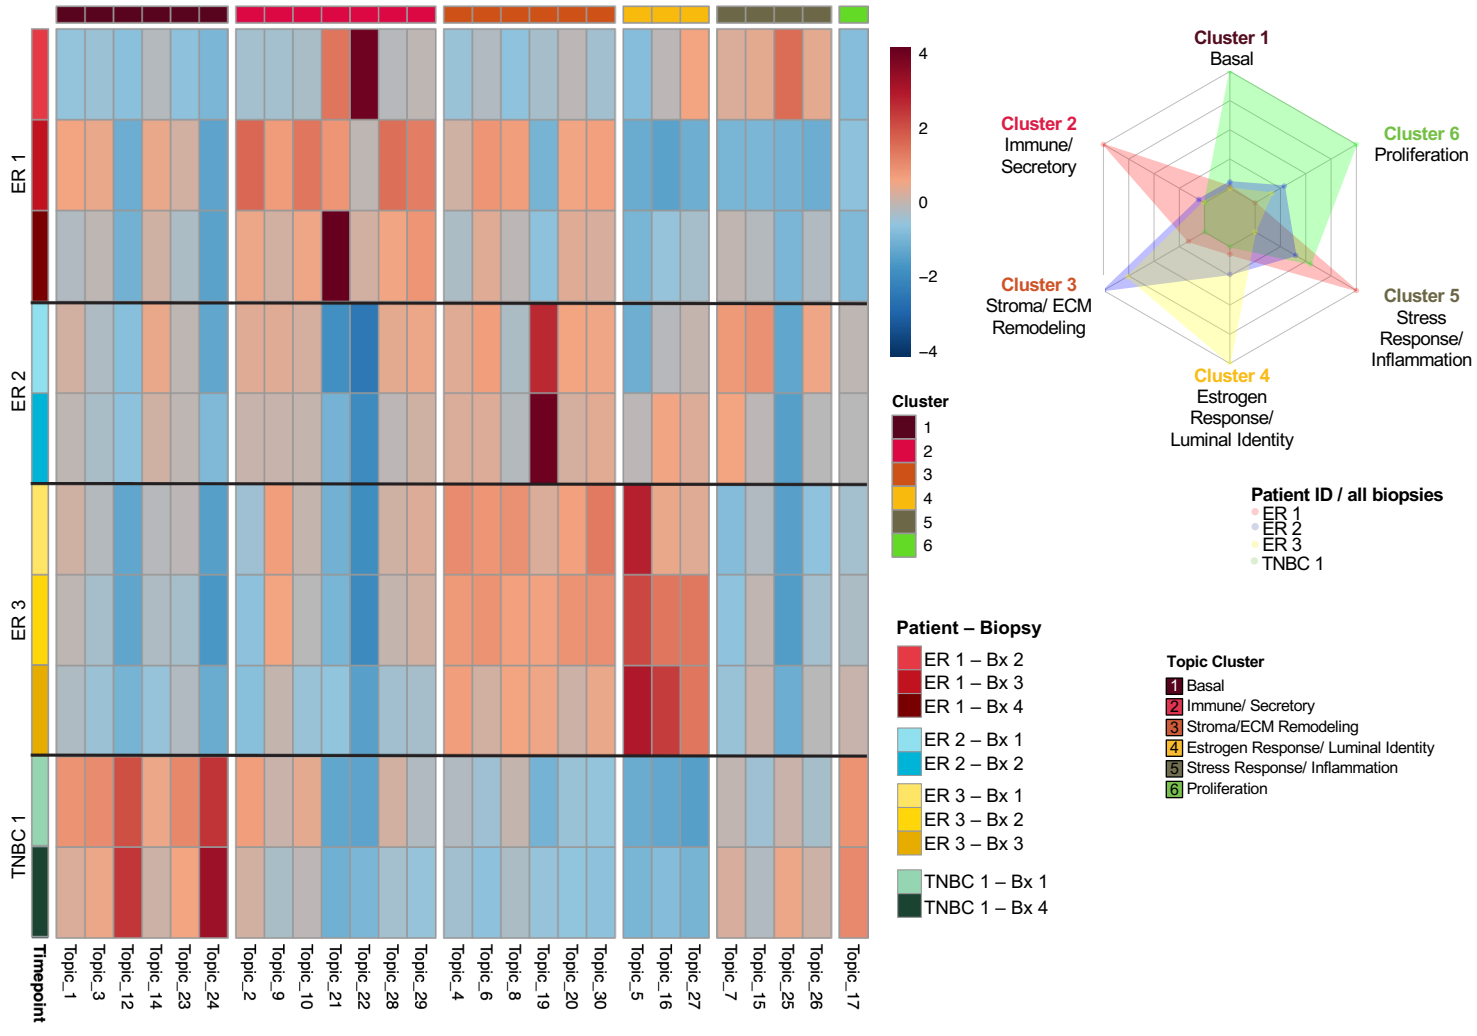

**a**

## Macrophages State Shifts

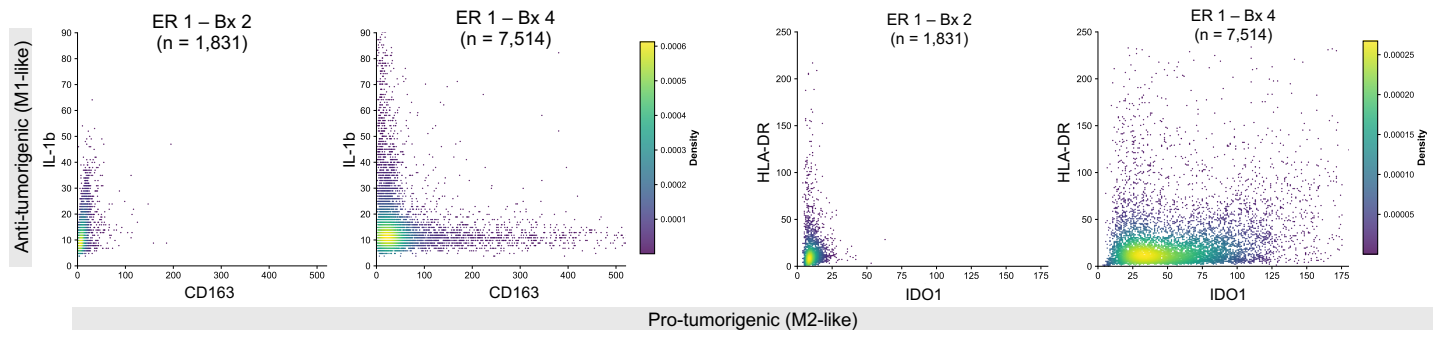

**b**

## T-cell Spatial Aggregation Strength – Ripley's L (RNA) T-cell Spatial Aggregation Strength – Ripley's L (Protein)

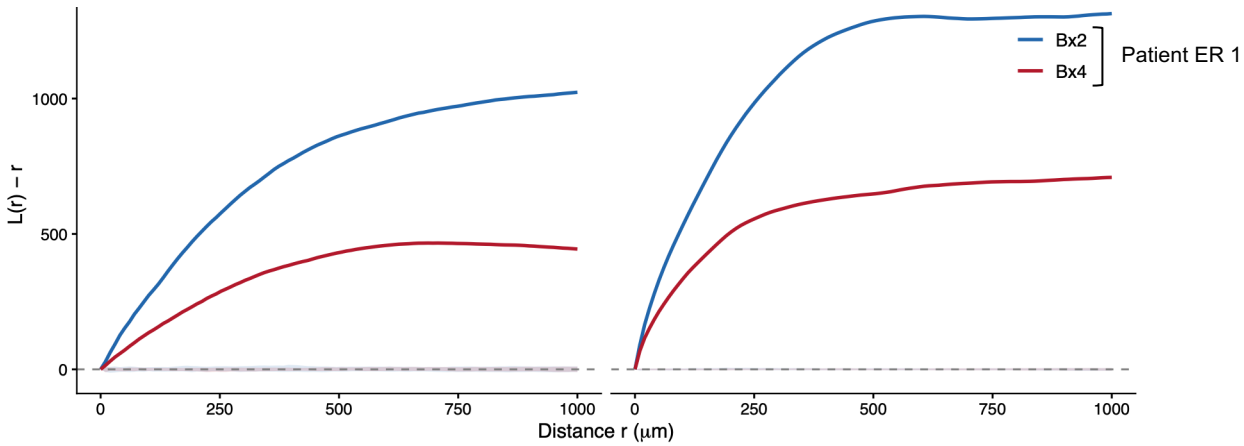

**c**

## Patient ER 1 – Bx 2 CosMx (Protein Expression)

## Patient ER 1 – Bx 4 CosMx (Protein Expression)

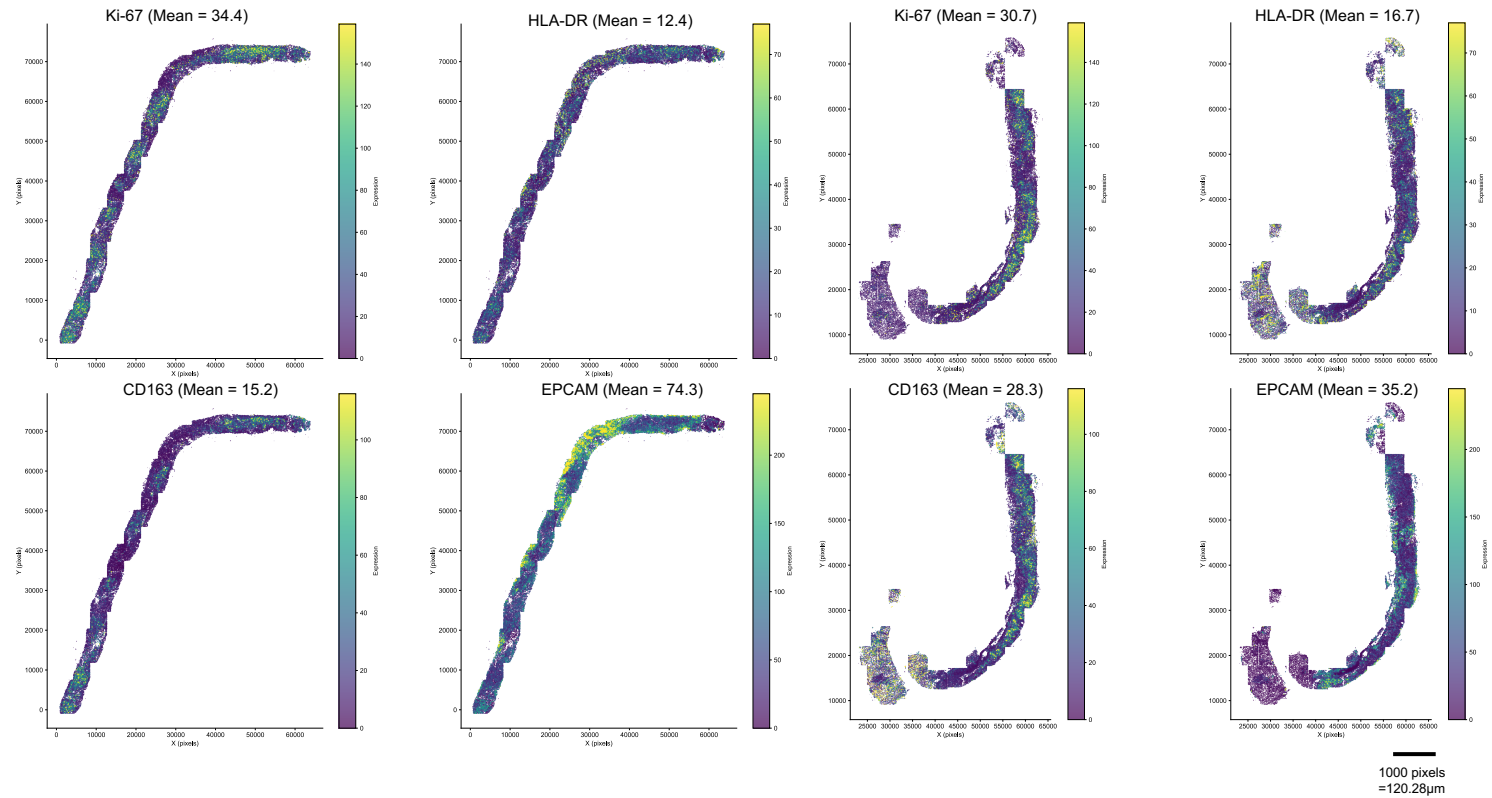

### **Extended Data Figure 1. TITAN topic modeling framework, spatial feature integration, and benchmarking against standard clustering.**

- a.** Overview of the TITAN topic modeling framework. TITAN decomposes single-cell gene expression into topic-cell and gene-topic matrices to identify latent transcriptional programs. Inferred topic scores can be projected onto tissue space to enable spatial visualization of transcriptional states.
- b.** Schematic illustrating the incorporation of spatial information into the TITAN framework. Spatial domain centroids are defined from cell coordinates, and per-cell distances to these centroids are computed and added to TITAN's input matrices as additional features for topic inference.
- c.** Uniform Manifold Approximation and Projection (UMAP) visualizations of spatial transcriptomics data of Seurat (left) and TITAN (right) clustering in all cells (n=345,207).
- d.** UMAP visualizations of spatial transcriptomics data as show in (c) colored by total RNA counts per cell (nCount\_RNA).
- e.** Distribution of detected features (nFeature\_RNA) across all samples shown as violin plots.
- f.** Distribution of RNA counts (nCount\_RNA) across all samples shown as violin plots.
- g.** Clustering quality comparison between Seurat and TITAN shown as a bar chart of coverage purity scores; higher relative values indicate greater influence of sequencing depth on cluster identity.
- h.** Gene count distributions (nCount RNA) across Seurat (left) and TITAN (right) clusters shown as box plots of log-transformed RNA counts.
- i.** Spatial mapping in Patient ER 1 Biopsy 2 (Bx2) and Bx4 of domain centroids as defined in methods and panel (b).
- j.** Spatial mapping in Patient ER 1 Biopsy 2 (Bx2) and Bx4 of gene expression for a representative interferon-stimulated gene (IFITM1), and topic score for a spatial topic representative of localized interferon signaling (Topic 46).

### **Extended Data Figure 2. Histopathological characterization of all biopsies.**

Representative H&E-stained sections from all biopsies across the four patients with pathological annotations. ER 1: Bx2 (liver), Bx3 (lumbar spine), Bx4 (liver). ER 2: Bx1 and Bx2 (lymph node). ER 3: Bx1 (lymph node), Bx2 and Bx3 (liver). TNBC 1: Bx1 (lymph node), Bx4 (soft tissue). Scale bars: 1 mm.

### **Extended Data Figure 3. STAGATE-defined spatial domain organization and cell type annotation across all biopsies.**

- a.** STAGATE-defined spatial domain organization across all biopsies. Each cell is colored by its assigned domain identity (0–9).
- b.** Cell type distribution across STAGATE-defined spatial domains for all biopsies.

#### **Extended Data Figure 4. Single-cell copy number alteration profiles and clone identification.**

- a.** Single-cell copy number alteration (CNA) profiles for all four patients shown as heatmaps. Rows represent individual cells ordered by clone assignment (Malignant or Diploid); columns represent chromosomal regions. Key recurrent alterations are annotated for each patient.
- b.** Visualization of patient ER 1 specific CNA at a genome wide level. (Top) Log<sub>2</sub> fold change (Log<sub>2</sub>FC) of gene expression in malignant cells relative to a diploid baseline for key copy number events; gains shown in red and losses in blue. (Bottom) Robustness of each inferred event quantified by probe effect size (Cohen's d).
- c.** Spatial overlay of CNA-based clone assignments in ER 1, Bx4, distinguishing malignant from diploid epithelial populations across the tissue section, with 11q13 copy number amplification Z-score overlaid on tissue morphology. A high-resolution inset shows a tumor nest within the host liver tissue and its corresponding H&E stain; adjacent normal liver and solid tumor regions are annotated.

#### **Extended Data Figure 5. Transcriptional topic landscape across all patients and biopsies.**

Transcriptional program composition across all patients and biopsies. (Left) Relative enrichment of all 30 TITAN-identified topics across all patient biopsies shown as a heatmap, grouped into six functional clusters: Basal (Cluster 1), Immune/Secretory (Cluster 2), Stroma/ECM Remodeling (Cluster 3), Estrogen Response/Luminal Identity (Cluster 4), Stress Response/Inflammation (Cluster 5), and Proliferation (Cluster 6). (Right) Relative contribution of each functional cluster per patient across all biopsies shown as a radar plot.

#### **Extended Data Figure 6. T cell spatial organization and protein marker validation in ER 1.**

- a.** Macrophage phenotype marker co-expression in ER 1 Bx2 (n=1,831) and Bx4 (n=7,514) shown as scatter plots comparing anti-tumorigenic M1-like markers (IL-1 $\beta$ , HLA-DR) and pro-tumorigenic M2-like markers (CD163, IDO1), supporting the macrophage polarization shift toward an M2-like state in Bx4 shown in Fig. 2h.
- b.** T cell spatial aggregation in ER 1 quantified using Ripley's L function, comparing Bx2 and Bx4 based on RNA-based (left) and protein-based (right) T cell identification. Decreased L(r) values in Bx4 indicate dispersal of spatially organized T cell clusters.
- c.** Spatial distribution of key protein marker (Ki-67, HLA-DR, CD163, EPCAM) expression in ER 1 Bx2 and Bx4 from the CosMx protein panel, with mean expression values indicated per biopsy. 1 pixel=0.12028  $\mu$ m.
