# Supplementary material for: Serial Spatial Transcriptomics Reveal Divergent Routes to Therapy Resistance in Metastatic Breast Cancer
Source: Research Square preprint supplement (doi:10.21203/rs.3.rs-9365657/v1), 2026-04-15
Supplement: Supplementary file 1 [file 603d8a1d2b9bafb684a9df2c.xlsx]

## Sheet: Table1_CNA
Patient	Biopsy	Gene	Type	Copy Number	Chromosome	Source
ER 1	Bx1	CCND1	Amplification	16-26	11	GeneTrails
ER 1	Bx1	FGF19	Amplification	16-26	11	GeneTrails
ER 1	Bx1	FGF3	Amplification	16-26	11	GeneTrails
ER 1	Bx1	FGF4	Amplification	16-26	11	GeneTrails
ER 1	Bx1	MDM4	Amplification	8-11	1	GeneTrails
ER 1	Bx1	DDR2	Amplification	8-11	1	GeneTrails
ER 1	Bx1	CDKN2A	Loss	0.9	9	GeneTrails
ER 1	Bx1	CHEK1	Loss	0.6	11	GeneTrails
ER 1	Bx1	FGFR1	Loss	0.4-0.8	8	GeneTrails
ER 1	Bx1	IDO1	Loss	0.4-0.8	8	GeneTrails
ER 1	Bx1	IDO2	Loss	0.4-0.8	8	GeneTrails
ER 1	Bx1	RAD51D	Loss	0.6	17	GeneTrails
ER 1	Bx2	CCND1	Amplification	20-31	11	GeneTrails
ER 1	Bx2	FGF19	Amplification	20-31	11	GeneTrails
ER 1	Bx2	FGF3	Amplification	20-31	11	GeneTrails
ER 1	Bx2	FGF4	Amplification	20-31	11	GeneTrails
ER 1	Bx2	MDM4	Amplification	6	1	GeneTrails
ER 1	Bx2	DDR2	Amplification	6	1	GeneTrails
ER 1	Bx2	CHEK1	Loss	0.7	11	GeneTrails
ER 1	Bx2	MRE11	Loss	0.7	11	GeneTrails
ER 1	Bx2	FGFR1	Loss	0.4-0.5	8	GeneTrails
ER 1	Bx2	IDO1	Loss	0.4-0.5	8	GeneTrails
ER 1	Bx2	IDO2	Loss	0.4-0.5	8	GeneTrails
ER 1	Bx2	ATM	Loss	0.5	11	GeneTrails
ER 1	Bx3	CCND1	Amplification	~19	11	GeneTrails
ER 1	Bx3	FGF3	Amplification	~19	11	GeneTrails
ER 1	Bx3	FGF4	Amplification	~19	11	GeneTrails
ER 1	Bx3	FGF19	Amplification	~19	11	GeneTrails
ER 1	Bx3	YES1	Amplification	~8	18	GeneTrails
ER 1	Bx3	CCND1	Gain	-	11	Tempus
ER 1	Bx3	PAK1	Gain	-	11	Tempus
ER 1	Bx3	FGF19	Gain	-	11	Tempus
ER 1	Bx3	FGF3	Gain	-	11	Tempus
ER 1	Bx3	FGF4	Gain	-	11	Tempus
ER 1	Bx3	RSF1	Gain	-	11	Tempus
ER 1	Bx3	TYMS	Gain	-	18	Tempus
ER 1	Bx4	CCND1	Amplification	~21	11	GeneTrails
ER 1	Bx4	FGF19	Amplification	~21	11	GeneTrails
ER 1	Bx4	FGF4	Amplification	~21	11	GeneTrails
ER 1	Bx4	FGF3	Amplification	~21	11	GeneTrails
ER 1	Bx4	YES1	Amplification	~19	18	GeneTrails
ER 1	Bx4	RIT1	Gain	~5.5	1	GeneTrails
ER 1	Bx4	NTRK1	Gain	~5.5	1	GeneTrails
ER 1	Bx4	SDHC	Gain	~5.5	1	GeneTrails
ER 1	Bx4	DDR2	Gain	~5.5	1	GeneTrails
ER 1	Bx4	MDM4	Gain	~5.5	1	GeneTrails
ER 1	Bx4	H3F3A	Gain	~5.5	1	GeneTrails
ER 1	Bx4	EGLN1	Gain	~5.5	1	GeneTrails
ER 1	Bx4	FH	Gain	~5.5	1	GeneTrails
ER 1	Bx4	AKT3	Gain	~5.5	1	GeneTrails
ER 1	Bx4	CCND1	Gain	-	11	Tempus
ER 1	Bx4	FGF19	Gain	-	11	Tempus
ER 1	Bx4	FGF3	Gain	-	11	Tempus
ER 1	Bx4	FGF4	Gain	-	11	Tempus
ER 1	Bx4	PAK1	Gain	-	11	Tempus
ER 1	Bx4	TYMS	Gain	-	18	Tempus
ER 2	Bx1	TSC1	Loss	-	9	Tempus
ER 2	Bx1	BRCA2	Loss	-	13	Tempus
ER 2	Bx2	MTAP	Loss	0	9	GeneTrails
ER 2	Bx2	CDKN2A	Loss	0	9	GeneTrails
ER 2	Bx2	ESR1	Loss	-	6	Tempus
ER 2	Bx2	CDKN2A	Loss	-	9	Tempus
ER 2	Bx2	BRCA2	Loss	-	13	Tempus
ER 2	Bx2	CDKN2B	Loss	-	9	Tempus
ER 2	Bx2	MTAP	Loss	-	9	Tempus
ER 3	Bx1	CHEK2	Loss	0.4	22	GeneTrails
ER 3	Bx1	CCND1	Amplification	~7	11	GeneTrails
ER 3	Bx1	CDKN2A	Loss	0.1	9	GeneTrails
ER 3	Bx1	RAD51B	Loss	0.3	14	GeneTrails
ER 3	Bx1	RAD51D	Loss	0.3	17	GeneTrails
ER 3	Bx1	FANCD2	Loss	0.4	3	GeneTrails
ER 3	Bx1	BRAF	Amplification	~15	7	GeneTrails
ER 3	Bx1	ERBB4	Gain	~7	2	GeneTrails
ER 3	Bx1	CHEK1	Loss	0.1	11	GeneTrails
ER 3	Bx1	CDKN1B	Loss	0.04	12	GeneTrails
ER 3	Bx1	TP53	Loss	0.4	17	GeneTrails
ER 3	Bx1	CHEK2	Loss	-	22	Tempus
ER 3	Bx1	BRAF	Gain	-	7	Tempus
ER 3	Bx1	RPS6KB1	Gain	-	17	Tempus
ER 3	Bx1	RSF1	Gain	-	11	Tempus
ER 3	Bx2	ERBB4	Gain	~5	2	GeneTrails
ER 3	Bx2	BRAF	Gain	~7	7	GeneTrails
ER 3	Bx2	RNF43	Gain	~6	17	GeneTrails
ER 3	Bx2	RAD51C	Gain	~6	17	GeneTrails
ER 3	Bx2	PPM1D	Gain	~9	17	GeneTrails
ER 3	Bx2	BRIP1	Gain	~9	17	GeneTrails
ER 3	Bx2	BRAF	Gain	-	7	Tempus
ER 3	Bx2	CHEK2	Loss	-	22	Tempus
ER 3	Bx2	PPM1D	Gain	-	17	Tempus
ER 3	Bx2	RPS6KB1	Gain	-	17	Tempus
ER 3	Bx2	RSF1	Gain	-	11	Tempus
ER 3	Bx2	PAK1	Gain	-	11	Tempus
ER 3	Bx3	ERBB4	Gain	~5	2	GeneTrails
ER 3	Bx3	BRAF	Gain	~6.5	7	GeneTrails
ER 3	Bx3	RNF43	Gain	~6	17	GeneTrails
ER 3	Bx3	RAD51C	Gain	~6	17	GeneTrails
ER 3	Bx3	PPM1D	Gain	~9	17	GeneTrails
ER 3	Bx3	BRIP1	Gain	~9	17	GeneTrails
TNBC 1	Bx1	MYC	Amplification	8.5	8	GeneTrails
TNBC 1	Bx1	RB1	Loss	0.96	13	GeneTrails
TNBC 1	Bx4	MYC	Gain	5.3	8	GeneTrails
TNBC 1	Bx4	PIK3CB	Gain	5	3	GeneTrails
TNBC 1	Bx4	ATR	Gain	5	3	GeneTrails
TNBC 1	Bx4	PRKAR1A	Gain	6.2	17	GeneTrails
TNBC 1	Bx4	PRKCA	Gain	6.2	17	GeneTrails
TNBC 1	Bx4	RNF139	Gain	5.3	8	GeneTrails
TNBC 1	Bx4	TP53	Loss	1	17	GeneTrails
TNBC 1	Bx4	MAP2K4	Loss	1	17	GeneTrails
TNBC 1	Bx4	MYC	Gain	-	8	Tempus

## Sheet: Table1_SNV
Patient	Biopsy	Gene	Variant	Protein Change	VAF (%)	Tier/Classification	Source Platform
ER 1	Bx1	PALB2	c.2993G>C	p.G998A	43	VUS (Tier III)	GeneTrails
ER 1	Bx2	PIK3CA	c.1624G>A	p.E542K	43	Tier II	GeneTrails
ER 1	Bx4	ARID1A	c.1696C>T	p.Q566*	39	Tier II	GeneTrails
ER 1	Bx4	ARID1A	c.1607C>T	p.S536F	49	Tier II	GeneTrails
ER 1	Bx4	IFNGR2	c.116C>G	p.S39*	44	Tier II	GeneTrails
ER 1	Bx4	PALB2	c.2993G>C	p.G998A	47	VUS (Tier III)	GeneTrails
ER 1	Bx4	LZTR1	c.1248G>A	p.M416I	6	VUS (Tier III)	GeneTrails
ER 1	Bx4	BRD4	c.2078C>G	p.S693C	5	VUS (Tier III)	GeneTrails
ER 1	Bx4	NCOR1	c.6578C>A	p.S2193*	45.6	Biologically Relevant	Tempus
ER 1	Bx4	ARID1A	c.1696C>T	p.Q566*	42.9	Biologically Relevant	Tempus
ER 2	Bx1	ESR1	c.1613A>G	p.D538G	-	Tier I	GeneTrails
ER 2	Bx1	BRCA2	c.9924C>G	p.Y3308*	-	Tier I	GeneTrails
ER 2	Bx1	FANCE	c.1249A>G	p.T417A	-	VUS (Tier III)	GeneTrails
ER 2	Bx1	MDC1	c.4924A>C	p.T1642P	-	VUS (Tier III)	GeneTrails
ER 2	Bx1	MSH6	c.3026A>T	p.K1009I	-	VUS (Tier III)	GeneTrails
ER 2	Bx1	ESR1	c.1613A>G	p.D538G	50.2	Potentially Actionable	Tempus
ER 2	Bx1	BRCA2	c.9924C>G	p.Y3308*	-	Germline Pathogenic	Tempus
ER 2	Bx1	MSH6	c.3026A>T	p.K1009I	-	Germline VUS	Tempus
ER 2	Bx1	SPG20	c.997C>T	p.L333F	71.7	VUS	Tempus
ER 2	Bx1	TENM2	c.1714G>A	p.G572S	68.9	VUS	Tempus
ER 2	Bx1	CDHR2	c.551_555delCCATAinsACATC	p.SI184YI	66.3	VUS	Tempus
ER 2	Bx1	TMPRSS15	c.1357C>T	p.Q453*	59.6	VUS	Tempus
ER 2	Bx1	ARHGEF38	c.204G>A	p.M68I	58.8	VUS	Tempus
ER 2	Bx1	FSCN3	c.1400T>A	p.V467E	56.8	VUS	Tempus
ER 2	Bx1	ISM1	c.1344C>A	p.S448R	56.0	VUS	Tempus
ER 2	Bx1	C2CD4C	c.967C>T	p.R323W	55.6	VUS	Tempus
ER 2	Bx1	GALNT5	c.928G>T	p.A310S	54.2	VUS	Tempus
ER 2	Bx1	NXN	c.1026G>C	p.E342D	54.2	VUS	Tempus
ER 2	Bx1	DNHD1	c.6991T>A	p.F2331I	54.1	VUS	Tempus
ER 2	Bx1	PCK2	c.1907G>A	p.R636H	53.3	VUS	Tempus
ER 2	Bx1	DPP10	c.157A>G	p.I53V	52.9	VUS	Tempus
ER 2	Bx1	C1orf50	c.163G>T	p.D55Y	52.4	VUS	Tempus
ER 2	Bx1	MKRN3	c.202C>T	p.R68C	51.9	VUS	Tempus
ER 2	Bx1	SSPO	c.4144_4150delCTGTGCC	p.L1382fs	51.3	VUS	Tempus
ER 2	Bx1	PPP2R2C	c.3G>T	p.M1?	51.0	VUS	Tempus
ER 2	Bx1	DAAM1	c.2516G>C	p.S839T	50.3	VUS	Tempus
ER 2	Bx1	PLEKHA8	c.692G>T	p.G231V	49.5	VUS	Tempus
ER 2	Bx1	WEE1	c.650C>T	p.T217I	49.2	VUS	Tempus
ER 2	Bx1	WDCP	c.851A>G	p.D284G	49.1	VUS	Tempus
ER 2	Bx1	GOLGA6L2	c.50C>A	p.T17N	47.0	VUS	Tempus
ER 2	Bx1	KLHL35	c.201_226del	p.S68fs	42.9	VUS	Tempus
ER 2	Bx1	PRMT8	c.236C>T	p.S79F	40.5	VUS	Tempus
ER 2	Bx1	CCDC82	c.856T>G	p.S286A	38.7	VUS	Tempus
ER 2	Bx1	GATAD2A	c.92_128del	p.M31fs	38.4	VUS	Tempus
ER 2	Bx1	ANKRD52	c.160G>C	p.V54L	38.1	VUS	Tempus
ER 2	Bx1	PCDHGA8	c.1448A>C	p.E483A	37.1	VUS	Tempus
ER 2	Bx1	MADD	c.1192G>A	p.D398N	35.5	VUS	Tempus
ER 2	Bx1	CIZ1	c.1268T>A	p.L423Q	35.4	VUS	Tempus
ER 2	Bx1	METTL22	c.811G>C	p.D271H	35.3	VUS	Tempus
ER 2	Bx1	ZNF655	c.1289_1300del	p.L430_H433del	35.2	VUS	Tempus
ER 2	Bx1	STX19	c.269G>C	p.R90T	35.2	VUS	Tempus
ER 2	Bx1	PRKD1	c.2368C>T	p.H790Y	35.0	VUS	Tempus
ER 2	Bx1	AFF1	c.2280_2434del	p.D761fs	34.9	VUS	Tempus
ER 2	Bx1	PRIM2	c.64T>C	p.Y22H	34.8	VUS	Tempus
ER 2	Bx1	DNAJC1	c.1256G>T	p.G419V	34.2	VUS	Tempus
ER 2	Bx1	TMPRSS11A	c.825C>A	p.D275E	34.0	VUS	Tempus
ER 2	Bx1	PLEKHH3	c.1156dupA	p.R386fs	34.0	VUS	Tempus
ER 2	Bx1	DSP	c.3253C>G	p.Q1085E	33.7	VUS	Tempus
ER 2	Bx1	DMD	c.6821G>T	p.G2274V	33.6	VUS	Tempus
ER 2	Bx1	C2CD4A	c.1052A>T	p.E351V	33.0	VUS	Tempus
ER 2	Bx1	HDAC3	c.736T>G	p.F246V	32.8	VUS	Tempus
ER 2	Bx1	DOCK10	c.4265A>T	p.Q1422L	32.5	VUS	Tempus
ER 2	Bx1	MYO1E	c.750C>G	p.D250E	32.4	VUS	Tempus
ER 2	Bx1	PRDM5	c.397G>A	p.E133K	32.1	VUS	Tempus
ER 2	Bx1	WNK3	c.2996G>T	p.S999I	32.0	VUS	Tempus
ER 2	Bx1	PRKD1	c.467C>T	p.A156V	31.6	VUS	Tempus
ER 2	Bx1	MYBPC1	c.428A>C	p.E143A	31.6	VUS	Tempus
ER 2	Bx1	AFM	c.307G>C	p.G103R	31.3	VUS	Tempus
ER 2	Bx1	LOC441155	c.1356C>G	p.S452R	30.9	VUS	Tempus
ER 2	Bx1	CA3	c.742C>T	p.Q248*	30.5	VUS	Tempus
ER 2	Bx1	MCM2	c.1632C>G	p.I544M	30.0	VUS	Tempus
ER 2	Bx1	CCT6A	c.1108C>G	p.R370G	29.8	VUS	Tempus
ER 2	Bx1	ACAD11	c.562C>G	p.Q188E	29.7	VUS	Tempus
ER 2	Bx1	FANCE	c.1249A>G	p.T417A	29.3	VUS	Tempus
ER 2	Bx1	STAG3	c.701C>G	p.T234S	29.0	VUS	Tempus
ER 2	Bx1	P2RX2	c.760G>T	p.E254*	28.9	VUS	Tempus
ER 2	Bx2	BRCA2	c.9924C>G	p.Y3308*	88	Tier I	GeneTrails
ER 2	Bx2	ESR1	c.1610A>C	p.Y537S	65	Tier I	GeneTrails
ER 2	Bx2	ATRX	c.6856C>G	p.L2286V	22	VUS (Tier III)	GeneTrails
ER 2	Bx2	FANCE	c.1249A>G	p.T417A	58	VUS (Tier III)	GeneTrails
ER 2	Bx2	POLE	c.5656T>A	p.Y1886N	28	VUS (Tier III)	GeneTrails
ER 2	Bx2	MSH6	c.3026A>T	p.K1009I	28	VUS (Tier III)	GeneTrails
ER 2	Bx2	ESR1	c.1610A>C	p.Y537S	51.1	Potentially Actionable	Tempus
ER 2	Bx2	BRCA2	c.9924C>G	p.Y3308*	-	Germline Pathogenic	Tempus
ER 2	Bx2	MSH6	c.3026A>T	p.K1009I	-	Germline VUS	Tempus
ER 2	Bx2	ARHGEF38	c.204G>A	p.M68I	77.4	VUS	Tempus
ER 2	Bx2	CDHR2	c.551_555delCCATAinsACATC	p.SI184YI	72.4	VUS	Tempus
ER 2	Bx2	C2CD4C	c.967C>T	p.R323W	70.3	VUS	Tempus
ER 2	Bx2	SNRNP200	c.1700C>A	p.A567D	63.0	VUS	Tempus
ER 2	Bx2	TMPRSS15	c.1357C>T	p.Q453*	62.9	VUS	Tempus
ER 2	Bx2	PCK2	c.1907G>A	p.R636H	62.6	VUS	Tempus
ER 2	Bx2	PPP2R2C	c.3G>T	p.M1?	62.6	VUS	Tempus
ER 2	Bx2	SPG20	c.997C>T	p.L333F	62.4	VUS	Tempus
ER 2	Bx2	TENM2	c.1714G>A	p.G572S	61.8	VUS	Tempus
ER 2	Bx2	ZMYM2	c.473C>A	p.S158Y	59.6	VUS	Tempus
ER 2	Bx2	MKRN3	c.202C>T	p.R68C	59.1	VUS	Tempus
ER 2	Bx2	PDZD4	c.2302C>A	p.P768T	58.9	VUS	Tempus
ER 2	Bx2	DPP10	c.157A>G	p.I53V	58.3	VUS	Tempus
ER 2	Bx2	DOCK10	c.4265A>T	p.Q1422L	57.4	VUS	Tempus
ER 2	Bx2	PLEKHA8	c.692G>T	p.G231V	55.6	VUS	Tempus
ER 2	Bx2	GMNN	c.133T>G	p.S45A	55.3	VUS	Tempus
ER 2	Bx2	DNHD1	c.6991T>A	p.F2331I	55.3	VUS	Tempus
ER 2	Bx2	DMD	c.6821G>T	p.G2274V	54.3	VUS	Tempus
ER 2	Bx2	GOLGA6L2	c.50C>A	p.T17N	53.9	VUS	Tempus
ER 2	Bx2	GALNT5	c.928G>T	p.A310S	51.1	VUS	Tempus
ER 2	Bx2	FSCN3	c.1400T>A	p.V467E	50.0	VUS	Tempus
ER 2	Bx2	ATRX	c.6970C>G	p.L2324V	40.4	VUS	Tempus
ER 2	Bx2	FANCE	c.1249A>G	p.T417A	40.5	VUS	Tempus
ER 2	Bx2	POLE	c.5656T>A	p.Y1886N	26.4	VUS	Tempus
ER 2	Bx2	FOXA1	c.424_470delinsCA	p.A142_G157delinsH	15.0	VUS	Tempus
ER 2	Bx2	MTOR	c.6922C>T	p.P2308S	11.1	VUS	Tempus
ER 3	Bx1	CHEK2	c.349A>G	p.R117G	89	Tier II	GeneTrails
ER 3	Bx1	GATA3	c.961dupT	p.C321fs	41.2	Potentially Actionable	Tempus
ER 3	Bx1	CHEK2	c.349A>G	p.R117G	-	Germline Pathogenic	Tempus
ER 3	Bx1	MYO15A	c.806C>T	p.P269L	81.7	VUS	Tempus
ER 3	Bx1	DEAF1	c.56_82del	p.V19_A27del	63.7	VUS	Tempus
ER 3	Bx1	HSF2	c.877G>T	p.D293Y	59.2	VUS	Tempus
ER 3	Bx1	ARHGAP6	c.2176+2T>C	Splice	57.1	VUS	Tempus
ER 3	Bx1	SULF1	c.1016G>A	p.R339H	55.5	VUS	Tempus
ER 3	Bx1	SCN5A	c.1598G>C	p.R533P	55.1	VUS	Tempus
ER 3	Bx1	MYCBP2	c.11938G>C	p.E3980Q	47.3	VUS	Tempus
ER 3	Bx1	TGDS	c.445A>C	p.S149R	45.0	VUS	Tempus
ER 3	Bx1	DCANP1	c.386G>A	p.R129Q	44.7	VUS	Tempus
ER 3	Bx1	PTPRQ	c.366T>A	p.N122K	43.6	VUS	Tempus
ER 3	Bx1	EPHB2	c.2864G>A	p.R955Q	43.5	VUS	Tempus
ER 3	Bx1	RBM47	c.541G>A	p.V181M	42.4	VUS	Tempus
ER 3	Bx1	SUSD4	c.1037A>T	p.K346M	42.0	VUS	Tempus
ER 3	Bx1	HAPLN4	c.289G>A	p.D97N	41.3	VUS	Tempus
ER 3	Bx1	CLCNKA	c.1192A>G	p.I398V	40.2	VUS	Tempus
ER 3	Bx1	SLC35E1	c.368C>G	p.S123C	40.1	VUS	Tempus
ER 3	Bx1	NPFFR1	c.671T>A	p.I224N	39.5	VUS	Tempus
ER 3	Bx1	CDSN	c.1493C>A	p.S498Y	39.2	VUS	Tempus
ER 3	Bx1	SCAF1	c.2569G>C	p.A857P	39.1	VUS	Tempus
ER 3	Bx1	DPP8	c.772A>C	p.N258H	39.0	VUS	Tempus
ER 3	Bx1	SLC10A2	c.365A>G	p.D122G	38.7	VUS	Tempus
ER 3	Bx1	SP3	c.1255_1256delCA	p.Q419fs	38.5	VUS	Tempus
ER 3	Bx1	ITSN2	c.4709G>A	p.R1570H	38.0	VUS	Tempus
ER 3	Bx1	ZSWIM8	c.3089_3090delCT	p.S1030fs	37.2	VUS	Tempus
ER 3	Bx1	TRIM49B	c.406C>A	p.H136N	37.0	VUS	Tempus
ER 3	Bx1	FOXD4L1	c.437G>A	p.R146H	37.0	VUS	Tempus
ER 3	Bx1	GDAP1L1	c.118_119delGCinsT	p.A40fs	36.8	VUS	Tempus
ER 3	Bx1	KIAA1107	c.3948G>C	p.W1316C	36.7	VUS	Tempus
ER 3	Bx1	ELL3	c.1037A>G	p.K346R	35.6	VUS	Tempus
ER 3	Bx1	FLVCR1	c.1391G>C	p.G464A	34.8	VUS	Tempus
ER 3	Bx1	FREM3	c.893G>C	p.G298A	33.7	VUS	Tempus
ER 3	Bx1	NOP56	c.104_105delCTinsTC	p.S35F	33.0	VUS	Tempus
ER 3	Bx1	HK2	c.2705C>T	p.A902V	32.9	VUS	Tempus
ER 3	Bx1	RYR3	c.6767T>C	p.L2256P	32.2	VUS	Tempus
ER 3	Bx1	MIDN	c.937_938delCTinsGA	p.L313D	31.7	VUS	Tempus
ER 3	Bx1	MIDN	c.934G>A	p.D312N	31.3	VUS	Tempus
ER 3	Bx1	TCTN2	c.233C>T	p.T78M	31.2	VUS	Tempus
ER 3	Bx1	DOCK1	c.2807A>T	p.N936I	30.8	VUS	Tempus
ER 3	Bx2	CHEK2	c.478A>G	p.R160G	71	Tier I	GeneTrails
ER 3	Bx2	BRAF	c.52C>G	p.L18V	13	VUS (Tier III)	GeneTrails
ER 3	Bx2	BRIP1	c.2209G>A	p.E737K	7.5	VUS (Tier III)	GeneTrails
ER 3	Bx2	BRIP1	c.2272G>A	p.V758I	7.5	VUS (Tier III)	GeneTrails
ER 3	Bx2	GATA3	c.958dupT	p.C320fs*32	36	VUS (Tier III)	GeneTrails
ER 3	Bx2	GATA3	c.961dup	p.C321fs	28.4	Potentially Actionable	Tempus
ER 3	Bx2	KMT2C (MLL3)	c.8390dup	p.E2798fs	20.5	Biologically Relevant	Tempus
ER 3	Bx2	CHEK2	c.349A>G	p.R117G	-	Germline Pathogenic	Tempus
ER 3	Bx2	DEAF1	c.56_82del	p.V19_A27del	60.3	VUS	Tempus
ER 3	Bx2	PTPRQ	c.366T>A	p.N122K	40.2	VUS	Tempus
ER 3	Bx2	ARHGAP6	c.2176+2T>C	Splice	39.1	VUS	Tempus
ER 3	Bx2	MYO15A	c.806C>T	p.P269L	36.1	VUS	Tempus
ER 3	Bx2	FLVCR1	c.1391G>C	p.G464A	33.3	VUS	Tempus
ER 3	Bx2	DCANP1	c.386G>A	p.R129Q	32.7	VUS	Tempus
ER 3	Bx2	TCTN2	c.233C>T	p.T78M	32.3	VUS	Tempus
ER 3	Bx2	ITSN2	c.4709G>A	p.R1570H	31.1	VUS	Tempus
ER 3	Bx2	SP3	c.1255_1256del	p.Q419fs	30.3	VUS	Tempus
ER 3	Bx2	SUSD4	c.1037A>T	p.K346M	29.9	VUS	Tempus
ER 3	Bx2	DPP8	c.772A>C	p.N258H	29.9	VUS	Tempus
ER 3	Bx2	RBM47	c.541G>A	p.V181M	28.8	VUS	Tempus
ER 3	Bx2	ZSWIM8	c.3089_3090del	p.S1030fs	28.3	VUS	Tempus
ER 3	Bx2	SLC35E1	c.368C>G	p.S123C	28.2	VUS	Tempus
ER 3	Bx2	NOP56	c.104_105delinsTC	p.S35F	27.9	VUS	Tempus
ER 3	Bx2	SULF1	c.1016G>A	p.R339H	27.6	VUS	Tempus
ER 3	Bx2	TGDS	c.445A>C	p.S149R	27.0	VUS	Tempus
ER 3	Bx2	FOXD4L1	c.437G>A	p.R146H	26.9	VUS	Tempus
ER 3	Bx2	CDSN	c.1493C>A	p.S498Y	26.3	VUS	Tempus
ER 3	Bx2	MIDN	c.934_938delinsAACGA	p.DL312ND	26.2	VUS	Tempus
ER 3	Bx2	SLC10A2	c.365A>G	p.D122G	26.1	VUS	Tempus
ER 3	Bx2	ELL3	c.1037A>G	p.K346R	25.7	VUS	Tempus
ER 3	Bx2	MYCBP2	c.11938G>C	p.E3980Q	25.2	VUS	Tempus
ER 3	Bx2	SCAF1	c.2569G>C	p.A857P	24.9	VUS	Tempus
ER 3	Bx2	SMG1	c.8111C>G	p.T2704S	24.5	VUS	Tempus
ER 3	Bx2	KIAA1107	c.3948G>C	p.W1316C	24.3	VUS	Tempus
ER 3	Bx2	HAPLN4	c.289G>A	p.D97N	24.1	VUS	Tempus
ER 3	Bx2	HSF2	c.877G>T	p.D293Y	24.0	VUS	Tempus
ER 3	Bx2	CLCNKA	c.1192A>G	p.I398V	22.9	VUS	Tempus
ER 3	Bx2	TRIM49B	c.406C>A	p.H136N	22.8	VUS	Tempus
ER 3	Bx2	GDAP1L1	c.117del	p.A40fs	21.8	VUS	Tempus
ER 3	Bx2	EPHB2	c.2864G>A	p.R955Q	21.5	VUS	Tempus
ER 3	Bx2	PDCD6	c.217G>A	p.D73N	20.2	VUS	Tempus
ER 3	Bx3	SND1-BRAF	Fusion	SND1 exon10-BRAF exon9	-	Tier I (Fusion)	GeneTrails
ER 3	Bx3	CHEK2	c.478A>G	p.R160G	67	Tier I	GeneTrails	Gain
ER 3	Bx3	ERBB4		-	-	Tier II	GeneTrails
ER 3	Bx3	BRAF	c.52C>G	p.L18V	12	VUS (Tier III)	GeneTrails
ER 3	Bx3	BRIP1	c.2209G>A	p.E737K	5-6	VUS (Tier III)	GeneTrails
ER 3	Bx3	BRIP1	c.2272G>A	p.V758I	5-6	VUS (Tier III)	GeneTrails
ER 3	Bx3	GATA3	c.958dupT	p.C320fs*32	32	VUS (Tier III)	GeneTrails
TNBC 1	Pre-Bx1	BRCA1	Deletion exons 13-15	Truncated BRCA1	-	Germline VUS, buccal wash	Myriad
TNBC 1	Bx1	TP53	c.814G>A	p.V272M	70	Tier II	GeneTrails
TNBC 1	Bx4	TP53	c.814G>A	p.V272M	77	Tier II	GeneTrails
TNBC 1	Bx4	COL2A1	c.2716G>C	p.G906R	47	VUS (Tier III)	GeneTrails
TNBC 1	Bx4	BRIP1	c.414A>C	p.L138F	18	VUS (Tier III)	GeneTrails
TNBC 1	Bx4	LZTR1	c.922C>T	p.P308S	88	VUS (Tier III)	GeneTrails
TNBC 1	Bx4	MSH3	c.1033A>T	p.N345Y	4	VUS (Tier III)	GeneTrails
TNBC 1	Bx4	KDM6A	c.3797_3798del	p.P1266fs	81.3	Biologically Relevant	Tempus
TNBC 1	Bx4	TP53	c.814G>A	p.V272M	75.9	Biologically Relevant	Tempus

## Sheet: Abbreviations
Supplementary Tables 1. Genomic alterations across all patients and biopsies.
Abbreviation	Explanation
CNA	Copy Number Alteration
SNV	Single Nucleotide Variant
VAF	Variant Allele Frequency
VUS	Variant of Uncertain Significance
Tier	Tier classifications follow AMP/ASCO/CAP somatic variant guidelines.
