# Supplementary material for: Serial Spatial Transcriptomics Reveal Divergent Routes to Therapy Resistance in Metastatic Breast Cancer
Source: Research Square preprint supplement (doi:10.21203/rs.3.rs-9365657/v1), 2026-04-15
Supplement: Supplementary file 2 [file fd4fcd2461d01b922c93c2a0.xlsx]

## Sheet: Table_2_allCosmx_cancerTITAN_to
Topic_1	Topic_2	Topic_3	Topic_4	Topic_5	Topic_6	Topic_7	Topic_8	Topic_9	Topic_10	Topic_11	Topic_12	Topic_13	Topic_14	Topic_15	Topic_16	Topic_17	Topic_18	Topic_19	Topic_20	Topic_21	Topic_22	Topic_23	Topic_24	Topic_25	Topic_26	Topic_27	Topic_28	Topic_29	Topic_30
ITGA1	LEFTY1	IGHG2	LY6D	HSPB1	TGFB1	KRT19	CLEC12A	CD40LG	SELL	CSHL1	KRT15	HSP90B1	PTGES	VEGFA	HSPB1	HMGB2	HBA1	COL1A1	C1QA	CCND1	CPB1	FPR1	KRT15	MX1	KRT19	GATA3	LEFTY1	EPHA2	CD37
LAIR1	XCL1	COL27A1	INHA	IGFBP5	IL1RAP	NEAT1	FGF1	TNF	FCGR3A	HILPDA	KRT17	SOD1	KRT20	NEAT1	GATA3	LGALS1	HBB	KRT19	CD68	CPB1	LTF	RPL21	CD59	SERPINA3	PSAP	ESR1	DUSP5	ITGAE	OLFM4
IL32	FCRLA	IGHA1	ICOS	FASN	FLT1	CRIP1	MZT2A	CYTOR	XCL1	PECAM1	CD59	MALAT1	CCL23	GDF15	HSP90AB1	H4C3	NPPC	FN1	SPP1	KLF2	B2M	FKBP11	KRT16	HLA-A	NEAT1	HSPA1A	SLC2A4	LDLR	DUSP6
RPL21	S100A4	MMP1	FGF1	GATA3	DUSP6	CTNNB1	PDGFRB	BMX	FASLG	FABP5	TM4SF1	JUN	CCR10	SAT1	FASN	TOP2A	DUSP5	KRT8	C1QC	XBP1	IFITM1	COL14A1	IL12RB2	HLA-C	CALM2	TNFSF10	RGS1	CASP3	BMP3
RARRES2	DDR2	ATF3	FFAR3	RNF43	AXL	CALM2	FABP5	EGF	RGS1	ICAM2	VIM	HSP90AA1	TGFBR1	PSAP	ESR1	BIRC5	CASP3	NEAT1	C1QB	S100P	XBP1	NANOG	TM4SF1	HLA-B	CRIP1	CCND1	FCGR3A	NOD2	HPGDS
NANOG	S100A2	FYN	CFD	PSCA	FES	STAT3	DUSP1	CD3D	TNFSF4	VEGFB	KRT16	EPCAM	NPR2	SOX4	IFI27	MKI67	PLAC8	MGP	ITGB2	SLPI	GLUL	CD33	KRT17	IFITM3	MIF	HSP90AB1	ETV4	NRIP3	SEC23A
ADGRA2	IL20	CPA3	ITGB8	FGFR3	TNFRSF1B	MIF	GDF9	CD19	S100A2	FZD6	LGALS1	CALM1	NLRP1	SQSTM1	HSPA1A	TUBB4B	RAMP1	HSPB1	TLR1	ITGB6	HLA-A	MMP8	KRT23	B2M	DDR1	IFI27	IL20	LAG3	KRT8
GADD45B	FCGR3A	RPL21	CD28	RELT	LYZ	KRT17	CD209	DUSP2	TGFB2	SERPINH1	HMGB2	VEGFB	EPOR	CDKN1A	HSP90AA1	MIF	CD209	COL3A1	TAGLN	SQSTM1	S100P	AHI1	KRT5	IFITM1	TYK2	CDH1	SELL	NRXN3	CXCL2
TPSB2	CD34	ADGRE2	FABP4	HILPDA	IL18R1	TYK2	GZMK	PDCD1	ABL2	DUSP1	CD44	TYK2	LIF	IFITM3	RAC1	STMN1	FKBP11	IGFBP7	ITGA5	COL9A2	CEACAM6	PRSS2	VIM	S100A6	HSP90AA1	LGALS3BP	NPPC	TLR7	GC
POU5F1	LEFTY2	PRSS2	KRT8	IFI27	ACVRL1	SQSTM1	SPINK1	IL1A	FCRLA	EPHB3	IL17RE	NR1H2	NLRC5	HSPA1B	HSPA1B	GPX1	JCHAIN	BGN	HLA-DPA1	GLUL	TIMP1	CD24	MMP7	KRT7	SQSTM1	CD63	JAG1	PPBP	CXCL5
ANXA1	FCER1G	CHEK2	HMGN2	FZD6	IFIH1	PSAP	ICOS	IAPP	EFNA4	COL14A1	KRT14	TUBB	BRCA1	MALAT1	TNFSF10	CALM1	BTK	CELSR1	CSK	JUNB	HLA-C	POU5F1	CRYAB	DDX58	GSN	ALCAM	TYMS	KRT10	SPRY2
COL9A1	EFNA4	HLA-DQB1	VTN	RAC1	S100A9	CELSR1	CFLAR	CCR7	CD48	RPL21	IL12RB2	RPL21	CLEC4A	CD55	TYK2	SOD1	IL23A	MALAT1	KRT4	DDC	CCND1	FZD7	IL17RE	CLU	KRT17	HSPB1	IL18R1	FES	TNFRSF19
PRSS2	IL6R	PNOC	PTK6	ACE	TNFSF14	MALAT1	FFAR3	PDGFC	JAK2	CFLAR	CD74	C9orf16	IGHG1	KRT19	HSP90B1	EZH2	FGG	COL1A2	IGFBP7	S100A6	IFITM3	ADORA2A	CD44	SOD2	VEGFA	SQSTM1	EPOR	TNFRSF13B	CXCL9
ITGA2	CD5L	RPL32	CLCF1	FABP5	IGF2	LTBR	SNAI1	IL34	IL20	RELT	MIF	TNFRSF12A	ADGRF1	EFNA1	SEC61G	DNMT1	CLEC12A	IGF1R	ANGPT4	B2M	S100A6	MZT2A	COL9A3	OAS2	TACSTD2	KRT8	ITGA9	BID	PLAC8
CPA3	CD84	SYK	PF4	HSP90AB1	QRFPR	DUSP4	PTTG1	ADGRF4	GDF10	WNT2B	COL16A1	CSHL1	IL32	JUN	LGALS3BP	CALM2	MZT2A	TAGLN	NOD2	FOS	AZGP1	FZD4	HMGB2	OAS3	MALAT1	HSPA1B	S100A4	YES1	IGFBP5
IGHG1	IL24	TNFSF13B	TSC22D1	HSP90B1	EPHB2	WNT7B	NR3C1	TNFSF14	FCER1G	C9orf16	TPM2	RXRB	OSM	DST	KRT8	KRT17	CD36	AGR2	FLT1	TIMP1	CLU	H4C3	KRT14	BST2	CTNNB1	BAX	RARB	FGF13	LYZ
TIGIT	PIGR	RAC2	BTG1	PECAM1	CD79A	ANXA2	FGF7	IL12B	CD84	MAPK14	BMP4	DNMT1	IGHM	DDR1	CALM3	EPHB3	IFNL2	CDH1	TOX	SREBF1	CXCL17	MMP12	GPNMB	APP	ANXA2	ITGAV	CCL3L3	FFAR2	DCN
MZT2A	ABL2	MMP12	CASP8	ESR1	ADGRG3	ITGB5	HAVCR2	INHA	BMP2	MRC2	RARRES1	H2AZ1	CCL8	ZFP36	PTGES3	TUBB	GC	EPCAM	MMP2	BAX	COL9A2	MYH11	COL16A1	CD74	HSP90AB1	CD81	TLR3	CCR7	KITLG
FZD3	TNFSF4	CCL20	BCL2	TNFSF10	MT1X	HSP90AA1	HMGN2	MZT2A	RGS2	PTTG1	CRIP1	IRF3	NTRK2	CLDN4	CDH1	HSP90AA1	ACTG2	HSP90B1	CXCL6	YES1	MX1	BMPR1A	MAML2	EFNA1	ARF1	AR	ICAM1	TLR2	NR1H4
CD83	TNFSF18	MZT2A	FABP5	H2AZ1	NR1H4	RPL37	GPX3	PF4	CCL19	GSTP1	S100A10	GSTP1	ADGRD1	HSPA1A	KRT19	PCNA	NANOG	KRT18	SPARCL1	LGALS9	HLA-B	MYC	EZH2	MAF	ITGB4	XBP1	CCR5	NPPC	CXCL8
CCR1	IGHA1	WIF1	GLUD1	MZB1	IL1B	DDR1	FAS	CCL28	CD274	TNFRSF12A	IGF2R	NOSIP	GDF10	TYK2	CD63	EPCAM	EMP3	COL4A2	TNFRSF10D	INHBB	SERPINA3	IDO1	RARRES1	SOX9	AKT1	STAT1	ITGAE	ADGRA3	ITGA5
NRG1	ATF3	IL10RB	NGFR	PTK2	BTK	SOX9	ATG12	CLEC4A	NPPC	AATK	EZR	BCL2L1	IL11RA	JUNB	MT2A	CENPF	KIT	COL4A1	TPM1	ITGAM	MAF	NLRP2	BMP4	OAS1	STAT3	MT2A	CD5L	QRFPR	CXCL3
IL20RA	IGHG2	AHI1	CD209	CALM3	ANGPTL1	SREBF1	FKBP11	TNFSF8	IL10	KRT1	APP	JAK1	COL8A1	TACSTD2	SOD1	RPL21	SAA1	COL6A1	MAP1LC3B	IL6ST	KRT7	CASR	LGALS1	LMNA	HLA-C	ERBB3	TGFB2	KRT24	HCAR2
ACKR4	TLR5	ESAM	MZT2A	SIGIRR	C1QA	TNFRSF1A	CXCL2	BMP6	IFNB1	FKBP11	GPNMB	KRT1	WNT7B	PARP1	CD81	YBX3	IFNL3	PTGES3	TYROBP	ARF1	EFNA1	FGF7	APP	CRIP1	JUN	GDF15	CCRL2	IL4R	CD28
SRGN	CD48	CASR	MS4A1	SEC61G	IL1RL1	ITGB4	CYTOR	IL1R1	IFNA1	MZT2A	KRT23	CALM2	TEK	TPM1	ALCAM	IFNAR1	DMBT1	GAS6	KRT8	LGALS3	BST2	RPL32	EZR	JUNB	EZR	TPM1	TGFBR2	KLRB1	SERPINA1
KRT1	ACKR1	CD14	HCST	MRC2	IL2RG	GPX1	CCL26	IL1RL1	CCL5	LEP	MMP7	YBX3	S100A9	IER3	MTRNR2L1	MTRNR2L1	IL10RA	FASN	EPHA7	GDF15	ITGB6	CCL15	TPM2	STAT3	IFITM3	KRT19	IL1RN	TNFRSF18	FGG
CX3CR1	RGS2	HLA-DRB1	BMPR2	CSHL1	CXCL9	ARF1	BTK	OASL	BATF3	H2AZ1	LGALS3	EIF5A	HLA-E	INSR	STAT1	UBE2C	IL2RG	EPHA3	IRF4	AZGP1	LGALS9	CHEK1	SERPINA3	CTNNB1	LGALS3BP	RAC1	TNFRSF10D	CD4	APOD
LAMP3	KRT20	VPREB3	NR3C1	PTGES3	IFNL2	JUNB	C9orf16	STAT4	EOMES	MS4A4A	EZH2	CD9	TWIST2	CD164	EPCAM	AKT1	IL15	RARA	KRT80	EFNA1	OAS2	IFNAR1	CHI3L1	STAT1	IFI27	BST2	TNFRSF21	ADGRG5	EFNB2
GDF6	BATF3	FLT3LG	MPO	MMP16	OLFM4	VEGFA	TYMS	S100A9	S100A8	SPINK1	MMP14	MZT2A	PDCD1LG2	TNFRSF12A	G6PD	NLRP2	IL1A	HSPA1A	RARG	ITGAV	SREBF1	ITGA1	LGALS3	SOX4	CD55	HSP90AA1	WNT5B	JAG1	CXCL1
HLA-DPA1	CD55	IL17RB	PTGDR2	MT2A	SNAI2	SFN	ICOSLG	RPL34	PTGS2	BEST1	GPX1	DDR1	ARHGDIB	GSN	MALAT1	H2AZ1	IL2RA	SPP1	MTOR	ZFP36	STAT3	MMP1	CRIP1	IFI27	GPX1	TIMP1	IGHM	TNFSF8	LY6D
IGHG2	IGHG1	LIF	SOX2	SEC23A	IL1RN	IRF3	CSF2	CYP19A1	IL24	RBPJ	MYL9	TUBB4B	CCL21	CALM2	SQSTM1	MALAT1	LTB	RAMP3	CDH11	ERBB3	ALCAM	NOTCH3	MMP14	IFIH1	SOX4	TYK2	CIDEA	CD40LG	OXGR1
EFNA5	CCRL2	FZD3	C9orf16	FABP4	EFNB2	TUBB	CD28	CD8B	LEFTY2	CD209	MAML2	CFLAR	TNFSF13B	STAT1	KRT18	EZR	CXCR3	CD63	EPHB2	TNFRSF14	IER3	CLEC7A	MIF	DUSP4	TUBB	KITLG	VCAN	ANGPT2	CXCL10
C11orf96	XCL2	ADGRF5	KRT18	ICAM2	IL22RA1	GSN	RAMP1	CTLA4	ETV4	CHGA	COL9A3	FABP5	CCL13	ITGAV	PSCA	KRT14	VTN	PGR	ITGAM	AR	TNFSF10	CD58	KRT6A	PSAP	ERBB2	RXRA	PTGS2	TGFB2	IL23A
RGCC	IL10	THBS2	CALB1	DCN	RSPO3	LMNA	HSD3B2	SLC2A1	NPR2	NR3C1	CHI3L1	HTT	CCL18	ARF1	RELA	GSTP1	CD68	RXRA	IL6	NFKB1	KLF2	S100B	S100A10	TNFRSF1A	CD9	TACSTD2	IL10	IRF4	GPR183
FKBP11	IL17RB	RPL37	IGFBP3	MPO	G6PC2	CLDN4	IFNG	BID	IL22RA1	CYTOR	LMNA	H4C3	CCL5	CD47	JUN	ADIRF	PDGFRA	SMAD2	TWIST1	AGR2	GDF15	IL17RB	LMNA	LGALS3	PARP1	FASN	SRGN	KRT4	CLOCK
ATM	ROR1	CD47	IDO1	DHRS2	MXRA8	TACSTD2	HGF	IL17B	KRT24	TCL1A	CRYAB	CYSTM1	LCN2	BCL2L1	TUBB4B	TYK2	CD80	WNT7B	TNFRSF18	LDLR	TGFB3	YBX3	CD74	GSN	SAT1	BAG3	PTPRC	IL16	JCHAIN
TPSAB1	PTGS2	IGHM	IFNL2	PDGFA	CDH11	FZD1	CD52	CXCL14	PIGR	ACE	HLA-DRB5	RPL32	KRT10	MT1X	CD9	NR1H2	CD3G	COL6A2	KRT86	DUSP6	SOX4	RSPO2	MGP	GLUL	ITGB1	NFKBIA	CD34	DUSP5	ICOS
WNT9A	S100A8	LEFTY2	ADGRF3	HGF	SERPINB5	EPHB4	MMP9	ITGA2	CD34	CLEC12A	FOS	COL4A5	ACKR3	IL13RA1	H2AZ1	CALD1	CCL28	ANXA2	NFKBIA	HLA-C	JUNB	IL11	MYL9	SQSTM1	HSPA1A	NEAT1	MSMB	KRT18	STAT4
HIF1A	UPK3A	IFNGR1	EMP3	BCL2	NLRP1	HDAC11	EMP3	IL1R2	TNFSF18	HTT	KRT5	IFNAR1	CD163	BTG1	BCL2L1	CD24	HMGN2	IL6ST	CD276	GATA3	ITGAM	ITGA6	CD24	SFN	HSPA1B	ZFP36	ITGAM	C5AR2	TTR
NR1H3	CCL3	FOS	MAPK14	WNT2B	MAP1LC3B	NOTCH3	TLR4	DUSP1	HSD3B2	ITGA3	HLA-DRB1	HILPDA	NEAT1	OAS1	CSK	VEGFB	SLC40A1	ITGB1	PDGFC	ALCAM	TNFRSF1A	KRT1	WIF1	SAT1	CLDN4	OAS3	IL1R2	IL22RA1	LUM
MYH11	NLRP3	NR1H3	RPL34	DDIT3	TLR8	MST1R	BMP5	FASLG	WNT2	MALAT1	SOD2	ITGA3	ARTN	ANXA2	ERBB2	ATR	CXCL5	COL5A1	SOSTDC1	TNFRSF18	APP	WIF1	EFNA5	LCN2	IRF3	DNMT3A	IL4R	TOX	WNT10B
IGHD	PPARG	PPARA	TNFRSF11A	IGFBP7	LYN	IL6ST	IL34	PLA2R1	SCG5	CD28	B3GNT7	NEAT1	CIDEA	MAPK13	NEAT1	MZT2A	ADIPOQ	CALM2	COL4A1	DUSP4	CEACAM1	TOP2A	IGF2R	ICAM1	ITGA3	INSR	PDCD1LG2	FGF12	COL5A2
ADGRE1	IFNB1	SMARCB1	HDAC1	KITLG	SPRY2	ITGB1	GZMA	TTR	ADGRL4	CLOCK	SOX9	PCNA	ATM	TNFRSF14	STAT6	HLA-DRB1	SNAI1	HSP90AB1	IL17D	ITGB5	AR	MKI67	B3GNT7	VEGFA	CD81	CD164	IFNGR2	SPARCL1	ACVR2A
IL12A	WNT7B	GNLY	CLOCK	NFKBIA	ENTPD1	CD9	MSMB	MEG3	PTPRC	TLR4	HLA-B	IL10RB	TLR3	CXCL16	MAP1LC3B	IRF3	GZMH	CELSR2	MXRA8	IER3	TPM1	MMP10	EPHB3	HLA-E	JUNB	KRT18	DMBT1	IL2	KRT18
CD27	RGS5	MET	HDAC3	MALAT1	TNFRSF9	NR1H2	KRT1	IL32	NLRP3	SIGIRR	ITGB4	MIF	CD55	ERBB2	TPM1	HLA-DRA	BMP2	HDAC1	IL17RA	G6PD	OSMR	ADGRL1	SELENOP	TPM2	RPL37	STAT6	ADIPOQ	HCST	NFKBIA
PDGFD	EPHB4	COL9A1	RPL22	BGN	CXCR3	NOTCH1	BMPR2	GDF3	COL11A1	JAK1	EPHB3	COL14A1	OLR1	HSP90AA1	BAG3	LAMP2	GPBAR1	IGFBP5	TNFSF8	RPL22	SQSTM1	PNOC	GPX1	TGFB2	RPL22	ARF1	KLF2	CXCL8	CLEC14A
CCL26	DUSP5	IL2RB	MRC2	COL3A1	GPER1	PTGES2	IL1A	COL17A1	IL1RL1	SOD1	KRT6A	CRP	IL27RA	TGFB3	HTT	PRSS2	LY75	HSPA1B	HSD17B2	COL27A1	NFKB1	FGFR2	GSTP1	ITGB4	DST	SMAD2	CUZD1	PROKR1	NDRG1
VHL	ITGA2	CCL11	PTGES3	NDRG1	CXCL10	BECN1	CLEC7A	TLR8	CD38	IL17B	CD24	BCL2	NPPC	ITGA3	WNT2B	KRT6A	GZMB	BCL2L1	CLEC10A	IGF1R	ARF1	CHEK2	CIITA	CXCL17	COL1A1	PSAP	FYB1	WNT2	GPER1
CCL5	BRCA1	COL5A3	DHRS2	HDAC1	NOD2	CD47	RB1	GDNF	TGFBR2	PTGDR2	CIITA	DUSP1	IL33	HSP90AB1	DHRS2	ADGRL1	SAA2	COL6A3	PTGDS	FES	SOD2	LIF	SOD2	OASL	SOX9	MTOR	IL1B	TYMS	IL36G
LIFR	CENPF	IGHG1	STAT4	TLR4	VCAM1	VHL	CD40	EFNB1	CCL4	RXRB	COL18A1	RBPJ	LAG3	TNFRSF10B	CLDN4	CDKN3	PF4	YBX3	CXCL9	TP53	SOX9	TNFRSF11B	HLA-B	TAP1	STAT1	OAS1	FGF9	ANGPTL1	GZMB

## Sheet: Legend
Supplementary Table 2. Top 50 genes ranked by topic score for each TITAN-identified transcriptional topic in malignant cells.
Each column represents one of 30 TITAN-identified topics (Topic 1–30) derived from malignant cells across all patients and biopsies. Rows list the top 50 genes in descending order by gene-topic score.
